# Supplementary material for: Highly efficient photothermal branched Au–Ag nanoparticles containing procyanidins for synergistic antibacterial and anti-inflammatory immunotherapy
Source: Royal Society of Chemistry journal article supplement (doi:10.1039/d2bm01212j), 2023-01-01
Supplement: d2bm01212j1.pdf [file d2bm01212j1.pdf]

# A highly efficient photothermal branched Au-Ag nanoparticles containing procyanidins for synergistic antibacterial and anti-inflammatory immunotherapy

Hanchi Wang <sup>a,b</sup>, Dongyang Wang <sup>b</sup>, Huimin Huangfu <sup>a,b</sup>, Siyu Chen<sup>a,b</sup>, Qiuyue Qin <sup>a,b</sup>, Sicong Ren<sup>a,b</sup>, Yidi Zhang <sup>a,c\*</sup>, Li Fu<sup>a,b\*</sup>, Yanmin Zhou <sup>a,b\*</sup>

<sup>a</sup> Department of Oral Implantology, Hospital of Stomatology, Jilin University, Changchun, 130021, China

<sup>b</sup> Jilin Provincial Key Laboratory of Tooth Development and Bone Remodeling, Hospital of Stomatology, Jilin University, Changchun, 130021, China

<sup>c</sup> State Key Laboratory of Supramolecular Structure and Materials, College of Chemistry, Jilin University, Changchun 130012, China

Corresponding author: zhouym@jlu.edu.cn (Dr. Y. Zhou), fuli1127@jlu.edu.cn (Dr. L. Fu), zhangyidi@jlu.edu.cn (Dr. Y. Zhang)

## 1. Calculation of the photothermal conversion efficiency ( $\eta$ )

The specific derivation process of photothermal conversion efficiency was calculated as follows:

$$\eta = \frac{hS(T_{max} - T_0)}{I(1 - 10^{-A_{808}})}$$

(1)

Where  $T_{max}$  is the highest temperature of AuAg-PC NRs solution irradiated for 10 min, and  $T_0$  is the highest temperature of the water.  $I$  is the laser power (2.5w), and  $A_{808}$  is the absorbance of AuAg-PC at 808 nm.  $hS$  is directly derived from the formula:

$$\tau_s = \frac{m \times C}{hS}$$

(2)

$m = 1$  g,  $C = (4.2 \text{ J g}^{-1})$ .  $\tau_s$  is the slope of the fitting line between cooling time  $t$  and  $-\ln\theta$ .

$$t = -\tau_s(\ln\theta)$$

(3)

$$\theta = \frac{T - T_{surr}}{T_{max} - T_{surr}}$$

(4)

$T$  is the temperature corresponding to the cooling time, and  $T_{surr}$  is the ambient temperature.

## 2. Supplementary table

Table S1: EE (%) and DLC (%) for different NPs

| Materials   | DLC(%)         | EE(%)         |
|-------------|----------------|---------------|
| AuAg-PC I   | 6.667 ± 0.5819 | 65.23 ± 1.65  |
| AuAg-PC II  | 3.2 ± 0.4163   | 75.47 ± 1.541 |
| AuAg-PC III | 1.35 ± 0.3753  | 58.23 ± 1.198 |

Table S2: The antimicrobial activity of different treatment

| Materials       | MIC( $\mu\text{g ml}^{-1}$ ) | MBC( $\mu\text{g ml}^{-1}$ ) |
|-----------------|------------------------------|------------------------------|
| AuAg-PC I/NIR   | 150                          | 300                          |
| AuAg-PC II/NIR  | 75                           | 150                          |
| AuAg-PC III/NIR | 50                           | 100                          |

## 3. Supplementary figures

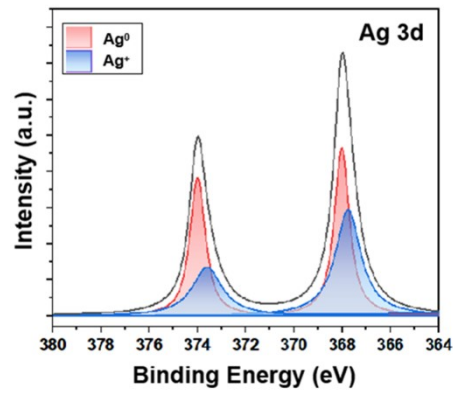

Fig. S1. XPS spectra of the Ag3d region of the AuAg-PC NPs.

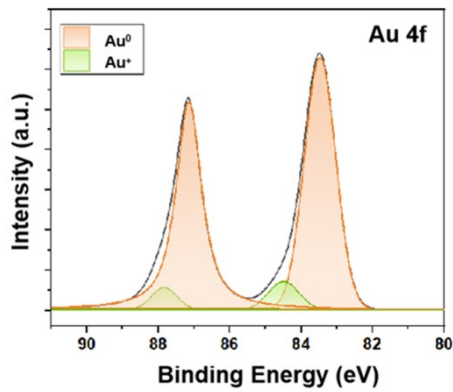

Fig. S2. XPS spectra of the Au4f region of the AuAg-PC NPs.

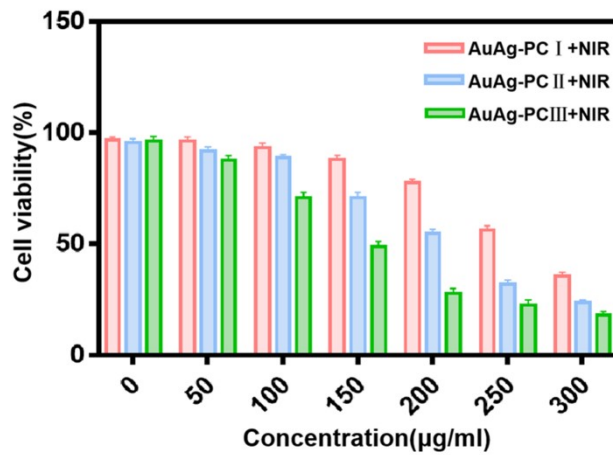

Fig. S3. Cytotoxicity of AuAg-PC NPs under NIR irradiation.

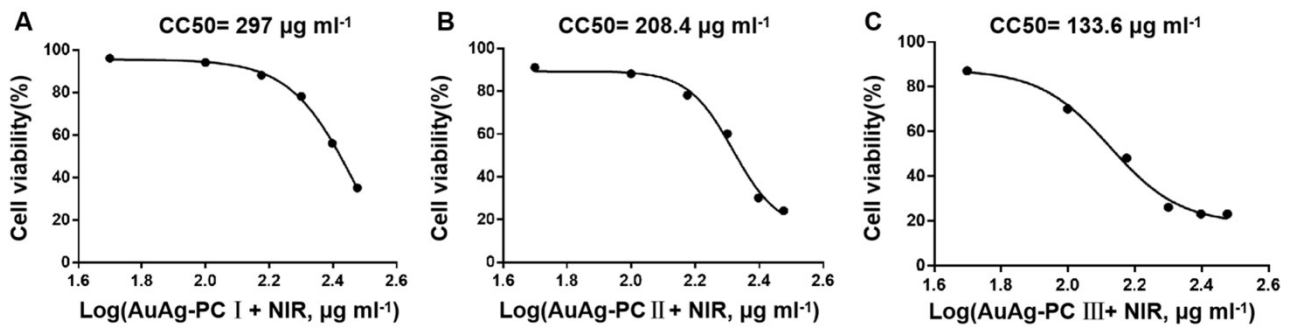

Fig. S4. Cytotoxic effect of (A) AuAg-PC I (B) AuAg-PC II and (C) AuAg-PC III under NIR irradiation.

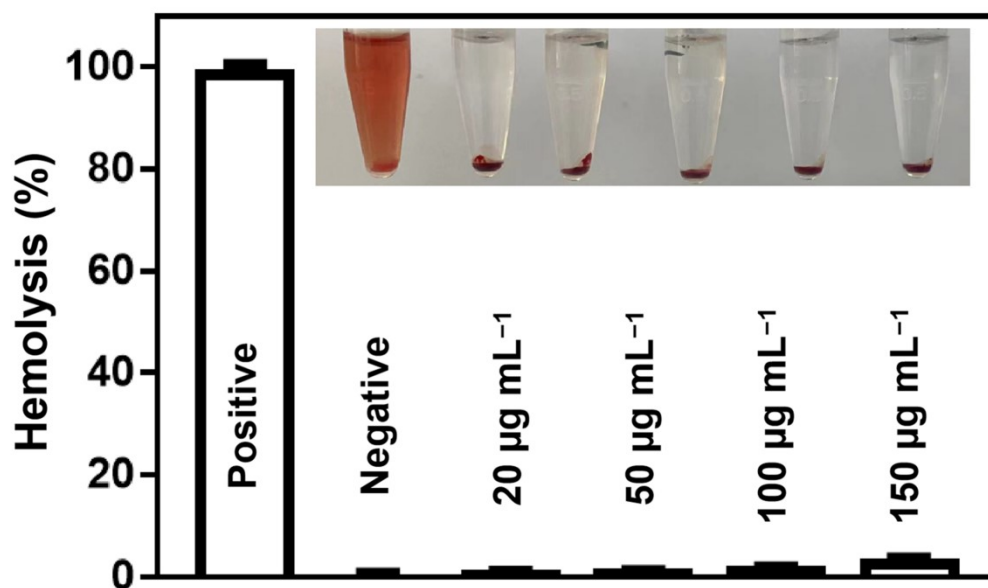

Fig. S5. Hemolysis ratios of fresh RBCs in the presence of AuAg-PC II.

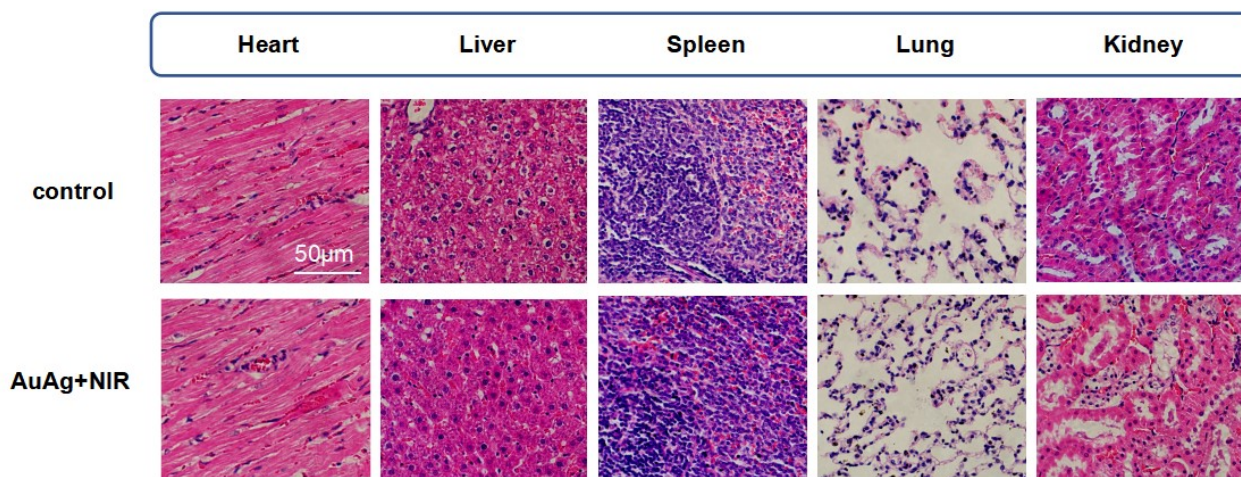

Fig. S6. HE staining sections of main organs.
